# Supplementary material for: Differential cell autonomous responses determine the outcome of coxsackievirus infections in murine pancreatic α and β cells
Source: eLife journal article supplement (doi:10.7554/elife.06990), 2015-06-10
Supplement: supp [file elife-06990-supp-v1.zip]

| ID     | Culture-confirmed CVB | Age     | Sex |
|--------|-----------------------|---------|-----|
| Pat 1* | CVB3                  | 3 days  | M   |
| Pat 2* | CVB2                  | 14 days | M   |
| Pat 3* | CVB2                  | 13 days | M   |

**Figure 12-figure supplement 1. List of human samples used.**
