# Supplementary material for: Differential cell autonomous responses determine the outcome of coxsackievirus infections in murine pancreatic α and β cells
Source: eLife journal article supplement (doi:10.7554/elife.06990), 2015-06-10
Supplement: supp [file elife-06990-supp-v1.zip]

| Date of the islet preparation | Age (years) | Gender | BMI (kg/m <sup>2</sup> ) | Cause of death      | Proportion of $\beta$ cells in the preparations (%) | Proportion of $\alpha$ cells in the preparations (%) |
|-------------------------------|-------------|--------|--------------------------|---------------------|-----------------------------------------------------|------------------------------------------------------|
| 14.04.2015                    | 73          | M      | 22.6                     | Cerebral hemorrhage | 60                                                  | 12                                                   |
| 22.04.2015                    | 63          | M      | 24.7                     | Cerebral hemorrhage | 49                                                  | 7                                                    |

M (male); BMI (body mass index).

**Figure 11-figure supplement 1. Characteristics of the 2 human donors used in the present study.**
