# Supplementary material for: Differential cell autonomous responses determine the outcome of coxsackievirus infections in murine pancreatic α and β cells
Source: eLife journal article supplement (doi:10.7554/elife.06990), 2015-06-10
Supplement: supp [file elife-06990-supp-v1.zip]

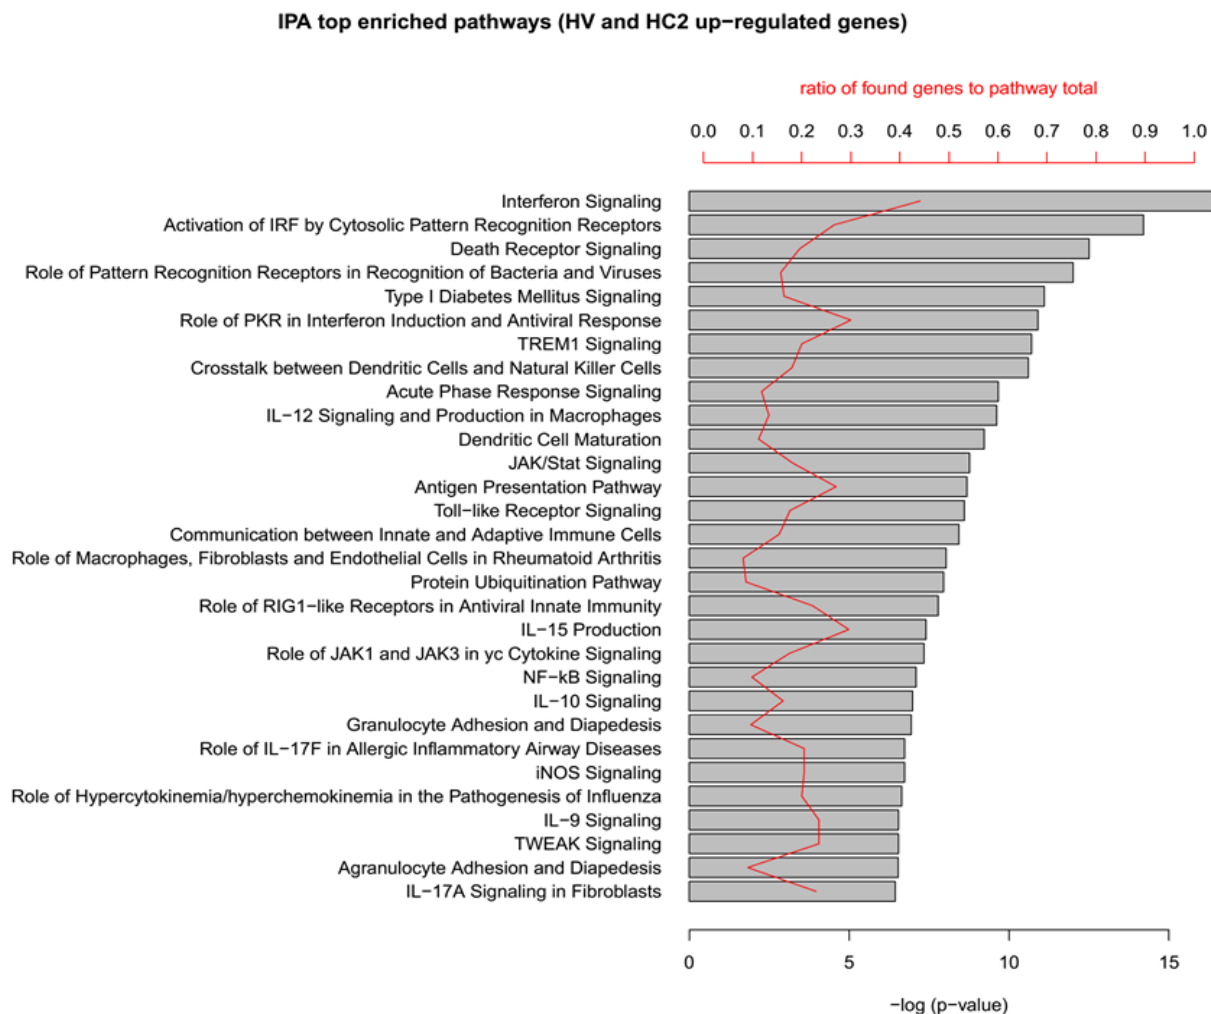

**Figure 1-figure supplement 3. IPA analysis of the up-regulated genes in human islets exposed to cytokines HC2 or infected with CVB5 (HV).**
