# Supplementary material for: Differential cell autonomous responses determine the outcome of coxsackievirus infections in murine pancreatic α and β cells
Source: eLife journal article supplement (doi:10.7554/elife.06990), 2015-06-10
Supplement: supp [file elife-06990-supp-v1.zip]

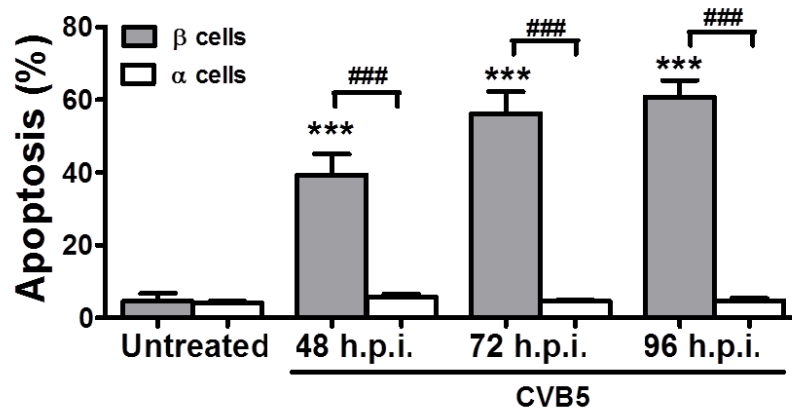

**Figure 3-figure supplement 4. Prolonged time-course of CVB5-induced apoptosis in pancreatic  $\alpha$  and  $\beta$  cells.**
