# Supplementary figures and images for: Differential cell autonomous responses determine the outcome of coxsackievirus infections in murine pancreatic α and β cells
Source: eLife journal article supplement (doi:10.7554/elife.06990), 2015-06-10

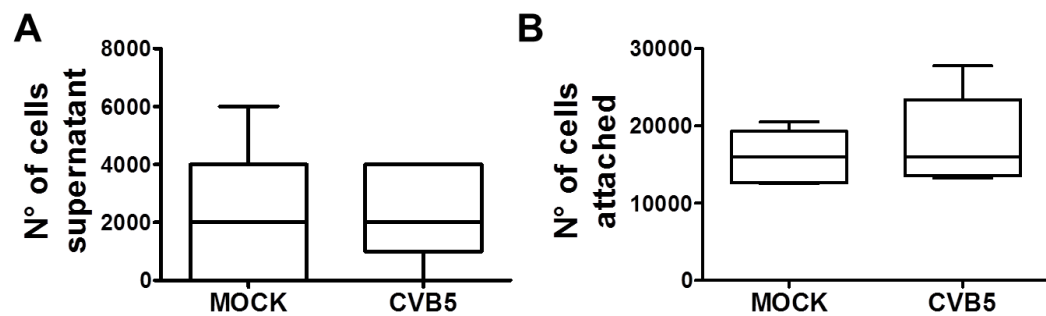

**Figure 3-figure supplement 6. Cell counting after CVB5 infection of pancreatic  $\alpha$  cells.**

Supplement: supp [file elife-06990-supp-v1.zip]
